# Supplementary material
Source: ML conference proceedings conference paper supplement (https://proceedings.mlr.press/v33/yang14a.html)
Supplement: Supplementary file 1 [file yang14a-supp.pdf]

## A Alternative Mixed Graphical Models

It is instructive to compare our class of mixed MRF distributions (5) with the models derived from the marginal distribution  $P(Z)$  and the conditional distribution  $P(Y|Z)$ .

Suppose that we model the conditional distribution  $P(Y|Z)$  as in the conditional distribution form of (6). Therefore, this alternative distribution has the same form of conditional distribution  $P(Y|Z)$  as . However, instead of assuming that each node-conditional distribution is drawn from an exponential family, which would then lead to our joint mixed MRF distribution in (5) for  $P(Y, Z)$ , we model the random vector  $Z$  separately as following a Markov Random Field (MRF) distribution:

$$P(Z) = \exp \left\{ \sum_{r' \in V_Z} \theta_{r'}^z B_Z(Z_{r'}) + \sum_{r' \in V_Z} C_Z(Z_{r'}) + \sum_{(r', t') \in E_Z} \theta_{r't'}^{zz} B_Z(Z_{r'}) B_Z(Z_{t'}) - A_Z(\theta^z, \theta^{zz}) \right\}. \quad (10)$$

Note that the log-partition function  $A_Z(\cdot)$  here is defined as

$$\log \sum_{Z \in \mathcal{Z}^I} \exp \left\{ \sum_{r' \in V_Z} \theta_{r'}^z B_Z(Z_{r'}) + \sum_{r' \in V_Z} C_Z(Z_{r'}) + \sum_{(r', t') \in E_Z} \theta_{r't'}^{zz} B_Z(Z_{r'}) B_Z(Z_{t'}) \right\},$$

which is dependent only on the parameters  $\theta^z$  and  $\theta^{zz}$ .

Given the specifications of the conditional distribution  $P(Y|Z)$  and the marginal distribution  $P(Z)$ , we can then specify the joint distribution simply as  $P(Y, Z) = P(Y|Z)P(Z)$ , so that

$$P(Y, Z; \theta) = \exp \left\{ \sum_{r \in V_Y} \theta_r^y B_Y(Y_r) + \sum_{r' \in V_Z} \theta_{r'}^z B_Z(Z_{r'}) + \sum_{(r, t) \in E_Y} \theta_{rt}^{yy} B_Y(Y_r) B_Y(Y_t) + \sum_{(r', t') \in E_Z} \theta_{r't'}^{zz} B_Z(Z_{r'}) B_Z(Z_{t'}) + \sum_{(r, r') \in E_{YZ}} \theta_{rr'}^{yz} B_Y(Y_r) B_Z(Z_{r'}) + \sum_{r \in V_Y} C_Y(Y_r) + \sum_{r' \in V_Z} C_Z(Z_{r'}) - A_{Y|Z}(\{\theta_r(Z)\}_{r \in V_Y}, \theta^{yy}) - A_Z(\theta^z, \theta^{zz}) \right\} \quad (11)$$

Note that this distribution is *distinct* from our mixed MRF distribution in (5). In particular, the log-partition function of (11) is *not*  $A_{Y|Z}(\cdot) + A_Z(\cdot)$  as  $A_{Y|Z}$  is a function on random vector  $Z$ .

The form of  $P(Y, Z)$  in (11) is thus much more complicated than that in (5) due to the complicated non-linear term  $A_{Y|Z}(\{\theta_r(Z)\}_{r \in V_Y}, \theta^{yy})$ . On the other

hand, an important benefit of this modeling approach is that the conditions for normalizability of (11) can be characterized simply as those on the marginal  $P(Z)$  (10) and those on the conditional  $P(Y|Z)$  (6). In other words, so long as (10) and (6) are well-defined, the joint distribution (11) always exists and is well-defined as well.

## B Proof of Theorem 1

This theorem can be understood as the extension of Proposition 2 in (Yang et al., 2012); the only difference here is that we allow the heterogeneous types of node-conditional distributions. We follow the proof policy of that paper: Define  $Q(X)$  as

$$Q(X) := \log(P(X)/P(\mathbf{0})),$$

for any  $X = (X_1, \dots, X_p) \in \mathcal{X}_1 \times \dots \times \mathcal{X}_p$  where  $\mathbf{0}$  indicates a zero vector (The number of zeros vary appropriately in the context below). For any  $X$ , also denote  $\bar{X}_r := (X_1, \dots, X_{r-1}, 0, X_{r+1}, \dots, X_p)$ .

Now, consider the following general form for  $Q(X)$ :

$$Q(X) = \sum_{t_1 \in V} X_{t_1} G_{t_1}(X_{t_1}) + \dots + \sum_{t_1, \dots, t_k \in V} X_{t_1} \dots X_{t_k} G_{t_1, \dots, t_k}(X_{t_1}, \dots, X_{t_k}), \quad (12)$$

since the joint distribution on  $X$  has factors of size  $k$  at most. It can then be seen that

$$\begin{aligned} \exp(Q(X) - Q(\bar{X}_r)) &= P(X)/P(\bar{X}_r) \\ &= \frac{P(X_r | X_1, \dots, X_{r-1}, X_{r+1}, \dots, X_p)}{P(0 | X_1, \dots, X_{r-1}, X_{r+1}, \dots, X_p)}, \end{aligned} \quad (13)$$

where the first equality follows from the definition of  $Q(X)$ . Now, consider simplifications of both sides of (13). Given the form of  $Q(X)$  in (12), we have

$$Q(X) - Q(\bar{X}_r) = X_1 \left( G_1(X_1) + \sum_{t=2}^p X_t G_{1t}(X_1, X_t) + \dots + \sum_{t_2, \dots, t_k \in \{2, \dots, p\}} X_{t_2} \dots X_{t_k} G_{1, t_2, \dots, t_k}(X_1, \dots, X_{t_k}) \right). \quad (14)$$

Also, given the exponential family form of the node-conditional distribution specified in the theorem,

$$\begin{aligned} \log \frac{P(X_r | X_1, \dots, X_{r-1}, X_{r+1}, \dots, X_p)}{P(0 | X_1, \dots, X_{r-1}, X_{r+1}, \dots, X_p)} &= \\ E_r(X_{V \setminus r})(B_r(X_r) - B_r(0)) + (C_r(X_r) - C_r(0)). \end{aligned} \quad (15)$$

Setting  $X_t = 0$  for all  $t \neq r$  in (13), and using the expressions for the left and right hand sides in (14)

and (15), we obtain,

$$\begin{aligned} & X_r G_r(X_r) \\ &= E_r(\mathbf{0})(B_r(X_r) - B_r(0)) + (C_r(X_r) - C_r(0)). \end{aligned}$$

Setting  $X_u = 0$  for all  $u \notin \{r, t\}$ ,

$$\begin{aligned} & X_r G_r(X_r) + X_r X_t G_{rt}(X_r, X_t) \\ &= E_r(\mathbf{0}, X_t, \mathbf{0})(B_r(X_r) - B_r(0)) + (C_r(X_r) - C_r(0)). \end{aligned}$$

Combining these two equations yields

$$\begin{aligned} & X_r X_t G_{rt}(X_r, X_t) \\ &= (E_r(\mathbf{0}, X_t, \mathbf{0}) - E_r(\mathbf{0}))(B_r(X_r) - B_r(0)). \quad (16) \end{aligned}$$

Similarly, from the same reasoning for node  $t$ , we have

$$\begin{aligned} & X_t G_t(X_t) + X_r X_t G_{rt}(X_r, X_t) \\ &= E_t(\mathbf{0}, X_r, \mathbf{0})(B_t(X_t) - B_t(0)) + (C_t(X_t) - C_t(0)), \end{aligned}$$

and at the same time,

$$\begin{aligned} & X_r X_t G_{rt}(X_r, X_t) \\ &= (E_t(\mathbf{0}, X_r, \mathbf{0}) - E_t(\mathbf{0}))(B_t(X_t) - B_t(0)). \quad (17) \end{aligned}$$

Therefore, from (16) and (17), we obtain

$$\begin{aligned} & E_t(\mathbf{0}, X_r, \mathbf{0}) - E_t(\mathbf{0}) \\ &= \frac{E_r(\mathbf{0}, X_t, \mathbf{0}) - E_r(\mathbf{0})}{B_t(X_t) - B_t(0)} (B_r(X_r) - B_r(0)). \quad (18) \end{aligned}$$

Since (18) should hold for all possible combinations of  $X_r, X_t$ , for any fixed  $X_t \neq 0$ ,

$$\begin{aligned} & E_t(\mathbf{0}, X_r, \mathbf{0}) - E_t(\mathbf{0}) \\ &= \theta_{rt}(B_r(X_r) - B_r(0)). \quad (19) \end{aligned}$$

Plugging (19) back into (17),

$$\begin{aligned} & X_r X_t G_{rt}(X_r, X_t) \\ &= \theta_{rt}(B_r(X_r) - B_r(0))(B_t(X_t) - B_t(0)). \end{aligned}$$

More generally, we can show that

$$\begin{aligned} & X_{t_1} \dots X_{t_k} G_{t_1, \dots, t_k}(X_{t_1}, \dots, X_{t_k}) = \\ & \theta_{t_1, \dots, t_k}(B_{t_1}(X_{t_1}) - B_{t_1}(0)) \dots (B_{t_k}(X_{t_k}) - B_{t_k}(0)). \end{aligned}$$

Thus, the  $k$ -th order factors in the joint distribution as specified in (12) are tensor products of  $(B_r(X_r) - B_r(0))$ , thus proving the statement of the theorem.

## C Proof of Theorem 2

We can simply start from the definition of the log partition function in the Manichean MRF joint distribu-

tion in (5):

$$\begin{aligned} A(\theta) = & \sum_{Y, Z} \exp \left\{ \sum_{r \in V_Y} \theta_r^y B_Y(Y_r) + \sum_{r' \in V_Z} \theta_{r'}^z B_Z(Z_{r'}) + \right. \\ & \sum_{(r, t) \in E_Y} \theta_{rt}^{yy} B_Y(Y_r) B_Y(Y_t) + \sum_{(r', t') \in E_Z} \theta_{r't'}^{zz} B_Z(Z_{r'}) B_Z(Z_{t'}) + \\ & \left. \sum_{(r, r') \in E_{YZ}} \theta_{rr'}^{yz} B_Y(Y_r) B_Z(Z_{r'}) + \sum_{r \in V_Y} C_Y(Y_r) + \sum_{r' \in V_Z} C_Z(Z_{r'}) \right\}. \end{aligned}$$

Simply this can be represented as

$$\begin{aligned} & \sum_{Y, Z} \left[ \exp \left\{ \sum_{r' \in V_Z} \theta_{r'}^z B_Z(Z_{r'}) + \sum_{(r', t') \in E_Z} \theta_{r't'}^{zz} B_Z(Z_{r'}) B_Z(Z_{t'}) \right. \right. \\ & \left. \left. + \sum_{r' \in V_Z} C_Z(Z_{r'}) \right\} \exp \left\{ \sum_{r \in V_Y} \theta_r^y B_Y(Y_r) + \sum_{r \in V_Y} C_Y(Y_r) \right. \right. \\ & \left. \left. + \sum_{(r, t) \in E_Y} \theta_{rt}^{yy} B_Y(Y_r) B_Y(Y_t) + \sum_{(r, r') \in E_{YZ}} \theta_{rr'}^{yz} B_Y(Y_r) B_Z(Z_{r'}) \right\} \right] \\ &= \sum_Z \left[ \exp \left\{ \sum_{r' \in V_Z} \theta_{r'}^z B_Z(Z_{r'}) + \sum_{(r', t') \in E_Z} \theta_{r't'}^{zz} B_Z(Z_{r'}) B_Z(Z_{t'}) \right. \right. \\ & \left. \left. + \sum_{r' \in V_Z} C_Z(Z_{r'}) \right\} \sum_Y \exp \left\{ \sum_{r \in V_Y} \theta_r^y B_Y(Y_r) + \sum_{r \in V_Y} C_Y(Y_r) \right. \right. \\ & \left. \left. + \sum_{(r, t) \in E_Y} \theta_{rt}^{yy} B_Y(Y_r) B_Y(Y_t) + \sum_{(r, r') \in E_{YZ}} \theta_{rr'}^{yz} B_Y(Y_r) B_Z(Z_{r'}) \right\} \right] \end{aligned}$$

Hence, we can conclude as in the statement since the term

$$\begin{aligned} & \sum_Y \exp \left\{ \sum_{r \in V_Y} \theta_r^y B_Y(Y_r) + \sum_{r \in V_Y} C_Y(Y_r) \right. \\ & \left. + \sum_{(r, t) \in E_Y} \theta_{rt}^{yy} B_Y(Y_r) B_Y(Y_t) + \sum_{(r, r') \in E_{YZ}} \theta_{rr'}^{yz} B_Y(Y_r) B_Z(Z_{r'}) \right\} \end{aligned}$$

is the conditional log-partition function  $A_{Y|Z}(\bar{\theta}^y(Z), \bar{\theta}^{yy})$  by definition.

## D Proof of Corollary 1

The conditional distribution  $P(Y|Z = z)$  for any particular assignment of the random variables  $Z$  is normalizable by assumption. It can then be shown that the log-partition function of the joint distribution is precisely given by  $E_{Z'} \left[ \exp \left\{ A_{Y|Z'}(\{\theta_r(Z')\}_{r \in V_Y}, \theta^{yy}) \right\} \right]$ . This expression is also finite and well-defined since there are only finitely many configurations of  $Z$ .

## E Proof of Theorem 3

Suppose that neither conditions (a) nor (b) are satisfied. Then, either  $X_r$  or  $X_t$  can possibly take values

approaching *both*  $\infty$  and  $-\infty$ . Also, for *some*  $\alpha, \beta \geq 0$  such that  $-C_r(X_r) = O(X_r^\alpha)$  and  $-C_t(X_t) = O(X_t^\beta)$ , we have  $(\alpha - 1)(\beta - 1) < 1$ . We will show that under these conditions, the necessary condition for normalizability detailed in Proposition 1 will be violated, that is:

$$C_r(X_r) + \theta_{rt}X_rX_t + C_t(X_t) \geq 0, \quad (20)$$

for sufficiently large  $X_r$  and  $X_t$ , from which we can conclude that the joint (5) is not normalizable. Note that we ignore the node-wise terms  $\theta_r X_r$  and  $\theta_t X_t$  without loss of generality in our asymptotic argument since they are asymptotically smaller than the quadratic term.

Consider the following sequences of values taken by the random variables  $X_r, X_t$ , where  $X_r = a^\gamma$  and  $X_t = a^\delta$  for arbitrary positive  $a$  and some *fixed* positive constants  $\gamma$  and  $\delta$ . We then have  $X_r X_t = a^{\gamma+\delta}$  and  $X_r^\alpha + X_t^\beta = a^{\alpha\gamma} + a^{\beta\delta}$ . As we increase  $a$ ,  $X_r$  and  $X_t$  will approach infinity, however, if  $\gamma + \delta > \max\{\alpha\gamma, \beta\delta\}$ , then  $C_r(X_r) + \theta_{rt}X_rX_t + C_t(X_t)$  will not be less than or equal to 0: in other words, the necessary condition for normalizability detailed in Proposition 1 will be violated.

**(case 1:  $\alpha$  or  $\beta$  is less than or equal to 1)**

Consider the case where  $\alpha \leq 1$ . If we simply set  $\gamma = \max\{\beta, 1\}$  and  $\delta = 1$ , then  $\gamma + \delta > \max\{\alpha\gamma, \beta\delta\}$ , so that the necessary condition for normalizability detailed in Proposition 1 will be violated as discussed above. By symmetry, the same will hold when  $\beta \leq 1$ . Thus, in this case, (20) always holds.

**(case 2: Both  $\alpha$  and  $\beta$  is larger than 1)** In this case, the condition  $\gamma + \delta > \max\{\alpha\gamma, \beta\delta\}$  can be rewritten as  $\delta > (\alpha - 1)\gamma$  and  $\frac{\gamma}{\beta - 1} > \delta$ . Hence, as long as  $(\alpha - 1)\gamma < \frac{\gamma}{\beta - 1}$ , we can always find  $\gamma$  and  $\delta$  satisfying  $\gamma + \delta > \max\{\alpha\gamma, \beta\delta\}$ , so that the necessary condition for normalizability detailed in Proposition 1 will be violated. By symmetry, the same will hold when  $\beta \leq 1$ . The earlier (case 1) also can be absorbed in this condition  $(\alpha - 1)\gamma < \frac{\gamma}{\beta - 1}$ , which is equivalent as  $(\alpha - 1)(\beta - 1) < 1$ .

Therefore, if  $(\alpha - 1)(\beta - 1) < 1$ , then the condition (20) always holds, so that from Proposition 1, the joint distribution in (5) will not be normalizable.
